# Supplementary material for: The influence of the type of face mask used by healthcare providers during the SARS-CoV-2 pandemic on the report of pain: a cross-sectional study in a pediatric emergency department
Source: PubMed Central journal article supplement — Transl Pediatr. 2023 Apr 11;12(5):890–6. doi: 10.21037/tp-22-511 (PMC10248939; doi:10.21037/tp-22-511), 2023-04-11
Supplement: tp-12-05-890-dss.pdf [file tp-12-05-890-dss.pdf]

## Data Sharing Statement

|                     |                                                                                                                                                     |                                                                                            |
|---------------------|-----------------------------------------------------------------------------------------------------------------------------------------------------|--------------------------------------------------------------------------------------------|
| <b>Article Info</b> | <a href="https://dx.doi.org/10.21037/tp-22-511">https://dx.doi.org/10.21037/tp-22-511</a>                                                           |                                                                                            |
| <b>Item</b>         | <b>Question</b>                                                                                                                                     | <b>Authors' Response<br/>(place "-" if not applicable)</b>                                 |
| 1                   | Would you like to share data collected for your study to others?                                                                                    | YES.                                                                                       |
| 2                   | If not, would you like to share the reason for your decision?                                                                                       | -                                                                                          |
| 3                   | What data in particular will be shared?                                                                                                             | Deidentified participant data.                                                             |
| 4                   | Any other documents will be shared? Such as study protocol, statistical analysis plan, informed consent form, clinical study report, analytic code. | No.                                                                                        |
| 5                   | When will data availability begin?                                                                                                                  | With Publication.                                                                          |
| 6                   | When will data availability end?                                                                                                                    | Two years within the publication date.                                                     |
| 7                   | To whom will you share the data?                                                                                                                    | Researchers whose proposed use of the data has been approved by the RHCC Ethics Committee. |
| 8                   | For what type of analysis or purpose?                                                                                                               | For any purpose approved by this committee.                                                |
| 9                   | How or where can the data/documents be obtained?                                                                                                    | After approval of a proposal and with the support of the principal investigator (IS)       |
| 10                  | Any other restrictions?                                                                                                                             | Any access to the data must be approved by the RHCC Ethics Committee.                      |
