# Supplementary material for: The influence of the type of face mask used by healthcare providers during the SARS-CoV-2 pandemic on the report of pain: a cross-sectional study in a pediatric emergency department
Source: PubMed Central journal article supplement — Transl Pediatr. 2023 Apr 11;12(5):890–6. doi: 10.21037/tp-22-511 (PMC10248939; doi:10.21037/tp-22-511), 2023-04-11
Supplement: tp-12-05-890-rc.pdf [file tp-12-05-890-rc.pdf]

## STROBE Statement—checklist of items that should be included in reports of observational studies

| Section/item                 | Item No | Recommendation                                                                                                                                                                                                                                                                                                                                                                                                                                                         | Reported on Page Number/Line Number            | Reported on Section/Paragraph |
|------------------------------|---------|------------------------------------------------------------------------------------------------------------------------------------------------------------------------------------------------------------------------------------------------------------------------------------------------------------------------------------------------------------------------------------------------------------------------------------------------------------------------|------------------------------------------------|-------------------------------|
| Title and abstract           | 1       | (a) Indicate the study's design with a commonly used term in the title or the abstract                                                                                                                                                                                                                                                                                                                                                                                 | Page 1 / Line 2<br>Page 2 / Line 31            | Abstract                      |
|                              |         | (b) Provide in the abstract an informative and balanced summary of what was done and what was found                                                                                                                                                                                                                                                                                                                                                                    | Page 2 / Lines 28-47                           | Abstract                      |
| <b>Introduction</b>          |         |                                                                                                                                                                                                                                                                                                                                                                                                                                                                        |                                                |                               |
| Background/<br>rationale     | 2       | Explain the scientific background and rationale for the investigation being reported                                                                                                                                                                                                                                                                                                                                                                                   | Page 3 / Lines 52-67                           | Introduction                  |
| Objectives                   | 3       | State specific objectives, including any prespecified hypotheses                                                                                                                                                                                                                                                                                                                                                                                                       | Page 3 / Lines 67-68                           | Introduction                  |
| <b>Methods</b>               |         |                                                                                                                                                                                                                                                                                                                                                                                                                                                                        |                                                |                               |
| Study design                 | 4       | Present key elements of study design early in the paper                                                                                                                                                                                                                                                                                                                                                                                                                | Pages 4-5 / Lines 73-101                       | Methods                       |
| Setting                      | 5       | Describe the setting, locations, and relevant dates, including periods of recruitment, exposure, follow-up, and data collection                                                                                                                                                                                                                                                                                                                                        | Page 4 / Lines 71-78<br>Page 5 /lines 104-123  | Methods                       |
| Participants                 | 6       | (a) <b>Cohort study</b> —Give the eligibility criteria, and the sources and methods of selection of participants. Describe methods of follow-up<br><b>Case-control study</b> —Give the eligibility criteria, and the sources and methods of case ascertainment and control selection. Give the rationale for the choice of cases and controls<br><b>Cross-sectional study</b> —Give the eligibility criteria, and the sources and methods of selection of participants | Page 3-4 / Lines 73-75                         | Methods                       |
|                              |         | (b) <b>Cohort study</b> —For matched studies, give matching criteria and number of exposed and unexposed<br><b>Case-control study</b> —For matched studies, give matching criteria and the number of controls per case                                                                                                                                                                                                                                                 |                                                |                               |
| Variables                    | 7       | Clearly define all outcomes, exposures, predictors, potential confounders, and effect modifiers. Give diagnostic criteria, if applicable                                                                                                                                                                                                                                                                                                                               | Pages 4-5 / Lines 81-103                       | Methods                       |
| Data sources/<br>measurement | 8*      | For each variable of interest, give sources of data and details of methods of assessment (measurement). Describe comparability of assessment methods if there is more than one group                                                                                                                                                                                                                                                                                   | Pages 4-5 / Lines 81-103                       | Methods                       |
| Bias                         | 9       | Describe any efforts to address potential sources of bias                                                                                                                                                                                                                                                                                                                                                                                                              | Page 5 /lines 109-113                          | Methods                       |
| Study size                   | 10      | Explain how the study size was arrived at                                                                                                                                                                                                                                                                                                                                                                                                                              | Page 3-4 / Lines 73-75<br>Page 4 / Lines 82-86 | Methods                       |
| Quantitative variables       | 11      | Explain how quantitative variables were handled in the analyses. If applicable, describe which groupings were chosen and why                                                                                                                                                                                                                                                                                                                                           | Page 6 / Lines 124-132                         | Methods                       |

|                     |     |                                                                                                                                                                                                                                                                                                           |                        |                     |
|---------------------|-----|-----------------------------------------------------------------------------------------------------------------------------------------------------------------------------------------------------------------------------------------------------------------------------------------------------------|------------------------|---------------------|
| Statistical methods | 12  | (a) Describe all statistical methods, including those used to control for confounding                                                                                                                                                                                                                     | Page 6 / Lines 124-132 | Methods             |
|                     |     | (b) Describe any methods used to examine subgroups and interactions                                                                                                                                                                                                                                       | Page 6 / Lines 124-132 | Methods             |
|                     |     | (c) Explain how missing data were addressed                                                                                                                                                                                                                                                               | -                      | -                   |
|                     |     | (d) <b>Cohort study</b> —If applicable, explain how loss to follow-up was addressed<br><b>Case-control study</b> —If applicable, explain how matching of cases and controls was addressed<br><b>Cross-sectional study</b> —If applicable, describe analytical methods taking account of sampling strategy | -                      | -                   |
|                     |     | € Describe any sensitivity analyses                                                                                                                                                                                                                                                                       | -                      | -                   |
| <b>Results</b>      |     |                                                                                                                                                                                                                                                                                                           |                        |                     |
| Participants        | 13* | (a) Report numbers of individuals at each stage of study—eg numbers potentially eligible, examined for eligibility, confirmed eligible, included in the study, completing follow-up, and analysed                                                                                                         | Page 6 / Line 135-139  | Results             |
|                     |     | (b) Give reasons for non-participation at each stage                                                                                                                                                                                                                                                      |                        |                     |
|                     |     | (c) Consider use of a flow diagram                                                                                                                                                                                                                                                                        | Page 6 / Line 136      | Results<br>Figure 1 |
| Descriptive data    | 14* | (a) Give characteristics of study participants (eg demographic, clinical, social) and information on exposures and potential confounders                                                                                                                                                                  | Page 6 / Line 139      | Results<br>Table 1  |
|                     |     | (b) Indicate number of participants with missing data for each variable of interest                                                                                                                                                                                                                       | -                      | -                   |
|                     |     | (c) <b>Cohort study</b> —Summarise follow-up time (eg, average and total amount)                                                                                                                                                                                                                          | -                      | -                   |
| Outcome data        | 15* | <b>Cohort study</b> —Report numbers of outcome events or summary measures over time                                                                                                                                                                                                                       | -                      | -                   |
|                     |     | <b>Case-control study</b> —Report numbers in each exposure category, or summary measures of exposure                                                                                                                                                                                                      | -                      | -                   |
|                     |     | <b>Cross-sectional study</b> —Report numbers of outcome events or summary measures                                                                                                                                                                                                                        | Page 6 / Line 139      | Results<br>Table 1  |
| Main results        | 16  | (a) Give unadjusted estimates and, if applicable, confounder-adjusted estimates and their precision (eg, 95% confidence interval). Make clear which confounders were adjusted for and why they were included                                                                                              | Page 6 / Line 142      | Results<br>Table 2  |
|                     |     | (b) Report category boundaries when continuous variables were categorized                                                                                                                                                                                                                                 | -                      | -                   |
|                     |     | © If relevant, consider translating estimates of relative risk into absolute risk for a meaningful time period                                                                                                                                                                                            | -                      | -                   |
| Other analyses      | 17  | Report other analyses done—eg analyses of subgroups and interactions, and sensitivity analyses                                                                                                                                                                                                            | Page 6 / Line 142      | Results<br>Table 2  |
| <b>Discussion</b>   |     |                                                                                                                                                                                                                                                                                                           |                        |                     |
| Key results         | 18  | Summarise key results with reference to study objectives                                                                                                                                                                                                                                                  | Page 7 / Line 149-155  | Discussion          |

|                          |    |                                                                                                                                                                            |                           |            |
|--------------------------|----|----------------------------------------------------------------------------------------------------------------------------------------------------------------------------|---------------------------|------------|
| Limitations              | 19 | Discuss limitations of the study, taking into account sources of potential bias or imprecision. Discuss both direction and magnitude of any potential bias                 | Page 9-10 / Lines 180-190 | Discussion |
| Interpretation           | 20 | Give a cautious overall interpretation of results considering objectives, limitations, multiplicity of analyses, results from similar studies, and other relevant evidence | Page 8-9 / Lines 155-178  | Discussion |
| Generalisability         | 21 | Discuss the generalisability (external validity) of the study results                                                                                                      | Page 10 / Lines 189-190   | Discussion |
| <b>Other information</b> |    |                                                                                                                                                                            |                           |            |
| Funding                  | 22 | Give the source of funding and the role of the funders for the present study and, if applicable, for the original study on which the present article is based              | Page 11 / Lines 201-207   | Funding    |

\*Give information separately for cases and controls in case-control studies and, if applicable, for exposed and unexposed groups in cohort and cross-sectional studies.

**Note:** An Explanation and Elaboration article discusses each checklist item and gives methodological background and published examples of transparent reporting. The STROBE checklist is best used in conjunction with this article (freely available on the Web sites of PLoS Medicine at <http://www.plosmedicine.org/>, Annals of Internal Medicine at <http://www.annals.org/>, and Epidemiology at <http://www.epidem.com/>). Information on the STROBE Initiative is available at [www.strobe-statement.org](http://www.strobe-statement.org).

Article information: <https://dx.doi.org/10.21037/tp-22-511>

\*As the checklist was provided upon initial submission, the page number/line number reported may be changed due to copyediting and may not be referable in the published version. In this case, the section/paragraph may be used as an alternative reference.
